# Supplementary material
Source: Research Square preprint supplement (doi:10.21203/rs.3.rs-8868553/v1)
Supplement: Supplementary file 1 [file 586f178953460c5b7b7bf702.docx]

Supplementary Information for

**A Dual-Mineral Protection Mechanism for Organic Matter Preservation: Implications for Mars Habitability and Biosignature Detection**

Tongtong Huang *et al.*

*Corresponding author. Email: weilin@mail.iggcas.ac.cn

**This PDF file includes:**

1. Detailed analytical methods

2. Supplementary Figs. S1 to S7

3. Supplementary Tables S1 to S3

**1. Detailed analytical methods**

**1.1. U-series dating method for gypsum**

For each analysis, approximately 200 mg of pristine gypsum crystals were selected to eliminate impurities within gypsum and cleaned in an ultrasonic bath with 100% alcohol to remove any surface contaminants. Chemical treatment followed the procedures outlined by a previous study 1. U and Th concentrations and isotopic compositions were determined using a Thermo-Fisher Neptune multi-collector inductively coupled plasma mass spectrometry (MC-ICP-MS) at the Institute of Geology and Geophysics, Chinese Academy of Sciences (IGGCAS), and the 230Th age was calculated. Mass spectrometry measurements were carried out according to the methods described in previous research 2.

**1.2. NanoSIMS analytical methods for elements and isotopes**

Prior to isotopic and elemental mapping of the particles, reactive Cs+ ions were implanted into the samples to enhance the secondary ion yields. The sample was coated with Au as an electrically conductive layer before NanoSIMS analyses. Elemental and isotopic images were acquired in three different sessions at the same area. In session 1, 12C, 13C, 16O, 28Si, 27Al16O were collected with a 5 pA Cs+ primary ion and a beam size of about 200 nm with raster size of 25 × 25 μm2. Each area was rastered in six frames for adequate counting statistics, with 512 × 512 pixels and a counting time of 524 s for each frame. In session 2, 12C, 12C1H, 16O, 12C14N were collected in 30 frames with 512 × 512 pixels and a counting time of 65 s for each frame. In session 3, 12C, 13C, 16O and 12C14N were collected in 50 frames with 64 × 64 pixels and the dwell time is 2ms/pixel with the raster size of 25 × 25 μm2. The high mass resolving power (~7000 Cameca definition) applied here was sufficient to eliminate significant mass interferences 3.

Recorded ion images were processed and analyzed using ImageJ with Open MIMS plugin. Firstly, the ion images were automatically aligned using the TurboReg ImageJ plugin. Subsequently, these drift-corrected frames were added. Based on the reference ion image of 12C, the regions of interest (ROIs) were selected. The C isotope of each area was calculated depend on the ion images acquired in session 3. Consequently, the summed intensity values from all pixels within each ROIs in an ion image represent the ion intensities of the respective mass in each area 4,5. These values in each ROI can be used for calculations of isotopic compositions of 13C/12C. The IAEA-600 was used as the standard sample to calibrate instrumental mass fractionation (IMF) of C isotope (Table S2). Quasi-simultaneous arrival (QSA) effect has been corrected in this study 6 (Fig. S3). All uncertainties are reported at the 1 SD level and include both the internal precision and the propagated uncertainty of QSA correction (Table S2).

**1.3. LA-ICP-MS analytical method**

Detailed positioning procedure and instrumental setup protocols were described previously 7. The energy density is 3 J/cm2, and the pulse frequency is 10 Hz. Generally, external standard and internal standard are both used to obtain the absolute content of elements. Since sodium is the major element in halite, it cannot be used as an internal standard due to the matrix effect. Therefore, in this study, we only used NIST 610 as the external standard and could obtain element ratios instead of absolute content. The raw data of all fluid inclusions were processed by the SILLS software package 8. Signal peaks of each fluid inclusion were double checked to ensure the reliability of reported values. To calculate elemental ratios, we employed a semi-quantitative normalization procedure. In the absence of internal standards for absolute quantification, we fixed the potassium concentration at 100,000 ppm as a reference point. This normalization enabled calculation of relative concentrations for other elements, from which we derived compositionally meaningful elemental ratios. It is important to note that these normalized concentrations are artificial values used solely for ratio calculations and do not represent actual elemental abundances in the samples.

**1.4. µXRD and XRD analytical methods for minerals in solid and fluid inclusions within gypsum and halite**

In situ micro-X-ray diffraction (µXRD) patterns for solid inclusions within gypsum were acquired using a Rigaku D/MAX RAPID-V diffractometer (Tokyo, Japan) equipped with a MicroMax-007HFM microfocus rotating anode X-ray generator and curved imaging plate (IP) detector at the micro-XRD lab in the Guangzhou Institute of Geochemistry, Chinese Academy of Sciences (GIGCAS). The system operated with Cu-Kα radiation (λ = 1.5418 Å) at 40 kV and 30 mA, collecting µXRD patterns through a 0.03 mm collimator during 1200 s exposures to guarantee sufficient intensity 9.

To analyze the mineral compositions in fluid inclusions within halite via XRD, we extracted minerals from these fluid inclusions by dissolving and centrifuging halite crystals. The detailed sample preparation and XRD analytical methods are described in detail in the supplementary material. Prior to dissolution, the halite samples were carefully separated into individual crystals and subjected to multiple ultrasonic cleaning cycles (totaling approximately 2 hours) in anhydrous ethanol to remove surface impurities. After the cleaning process, the halite crystals were weighed. They were then dissolved in deionized water and centrifuged (at 6,000 rpm for 20 min). The supernatant was discarded, and the remaining solids were dried and reweighed. This process yielded 8.2 mg of material from an initial 9.5 g of halite crystals. Due to the limited mass of the sample, it was mixed with 30 mg of quartz standard prior to XRD analysis to enhance the signal quality. The samples were loaded into a BTXTM III X-ray diffraction (XRD) Analyzer (Olympus) at GIGCAS. Cobalt was used as the radiation source under a normal voltage of 30 kV and a current of 1/3 mA. The XRD diffraction pattern was recorded for 2θ from 5° to 55°, with a total of 200 exposures for each sample at a frequency of 6 times per minutes. The total scan time for each sample was approximately 33 minutes.

**1.5. Metagenomic analysis for microbial carbon metabolism**

Microbial carbon metabolism potential was investigated in 140 microbial metagenome-assembled genomes from western Qaidam Basin soils 10,11 by searching key genes involved in the pathways of CO2 fixation and CH4 oxidation. Functional annotation of these genomes was conducted using METABOLIC v4.0 software with default parameters 12.

**References**

1 Edwards, R. L., Chen, J. & Wasserburg, G. 238U234U230Th232Th systematics and the precise measurement of time over the past 500,000 years. *Earth and Planetary Science Letters* **81**, 175-192 (1987).

2 Wang, L. S., Ma, Z. B., Cheng, H., Duan, W. H. & Le Xiao, J. Determination of 230Th dating age of Uranium-series standard samples by multiple collector inductively coupled plasma mass spectrometry. *Journal of Chinese Mass Spectrometry Society* **37**, 262-272 (2016).

3 Lin, Y. *et al.* NanoSIMS analysis of organic carbon from the Tissint Martian meteorite: Evidence for the past existence of subsurface organic‐bearing fluids on Mars. *Meteoritics & Planetary Science* **49**, 2201-2218 (2014). <https://doi.org/10.1111/maps.12389>

4 Hao, J.-L., Yang, W., He, H.-C., Zhang, D., Hu, S., Tian, H.-C., Li, R.-Y., Lin, Y.-T. Submicron spatial resolution Pb-Pb dating for the formation age of Chang'e-5 basalt. *Lithos* 468-469, 107495 (2024).

5 Hao, J.-L., Zhang, L.-P., Yang, W., Li, Z.-Y., Li, R.-Y., Hu, S., Lin, Y.-T. NanoSIMS sulfur isotopic analysis at 100 nm scale by imaging technique. *Frontiers in Chemistry* **11**, (2023).

6 Jones, C., Fike, D.A., Peres, P. Investigation of the quasi-simultaneous arrival (QSA) effect on a CAMECA IMS 7f-GEO. *Rapid communications in mass spectrometry: RCM* **31**, 623-630, (2017).

7 Pan, J.-Y., Ni, P., Wang, R.-C. Comparison of fluid processes in coexisting wolframite and quartz from a giant vein-type tungsten deposit, South China: Insights from detailed petrography and LA-ICP-MS analysis of fluid inclusions. *American Mineralogist* **104**, 1092-1116, (2019).

8 Guillong, M., Meier, D.L., Allan, M.M., Heinrich, C.A., Yardley, B. Appendix A6: SILLS: A MATLAB-based program for the reduction of laser ablation ICP-MS data of homogeneous materials and inclusions. *Mineralogical Association of Canada Short Course* **40**, 328-333, (2008).

9 Xi, J. X. *et al.* Micro-XRD Methods for Identifying Glass and Minerals in Extraterrestrial Samples. *Atomic Spectroscopy* **43**, 19-27 (2022). <https://doi.org/10.46770/As.2022.016>

10 Liu, L., Chen, Y., Shen, J., Pan, Y., Lin, W. Metabolic versatility of soil microbial communities below the rocks of the hyperarid Dalangtan Playa. *Appl Environ Microbiol* **89**, e0107223, (2023).

11 Liu, L., Liu, H., Zhang, W., Chen, Y., Shen, J., Li, Y., Pan, Y., Lin, W. Microbial diversity and adaptive strategies in the Mars‐like Qaidam Basin, North Tibetan Plateau, China. *Environmental Microbiology Reports* **14**, 873-885, (2022).

12 Zhou, Z., Tran, P.Q., Breister, A.M., Liu, Y., Kieft, K., Cowley, E.S., Karaoz, U., Anantharaman, K., 2022. METABOLIC: high-throughput profiling of microbial genomes for functional traits, metabolism, biogeochemistry, and community-scale functional networks. *Microbiome* **10**, 33, (2022).

**2. Supplementary Figures and Captions**


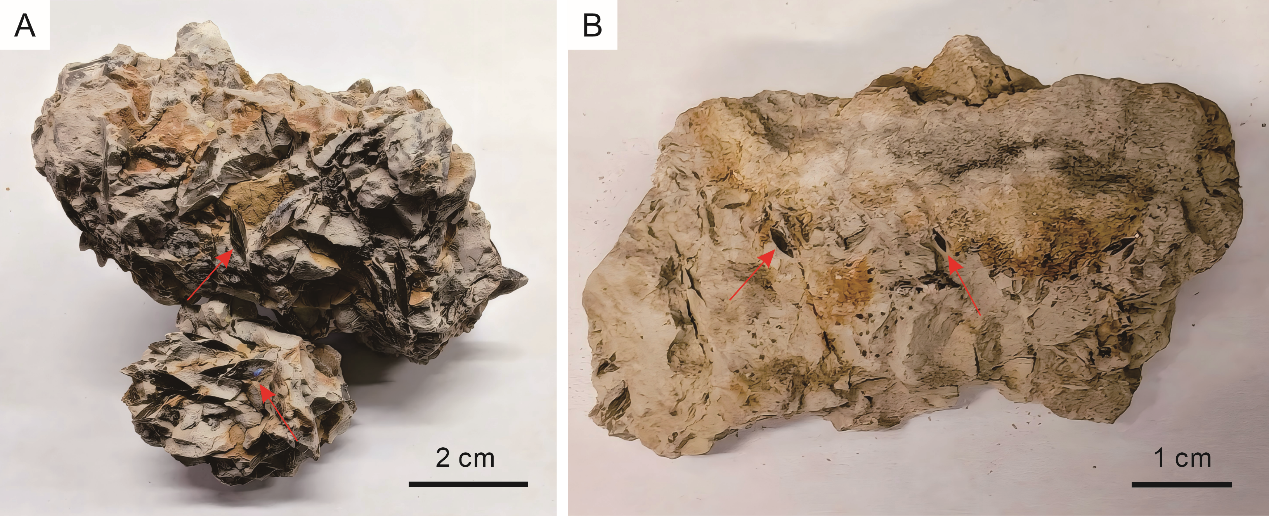


**Fig. S1: Samples from Gypsum-bearing siliciclastic mudstone beds. (A)** Gypsum-bearing siliciclastic mudstone from the middle part (M) in Fig. 1B. **(B)** Gypsum-bearing siliciclastic mudstone from the lower part (L) in Fig. 1B.


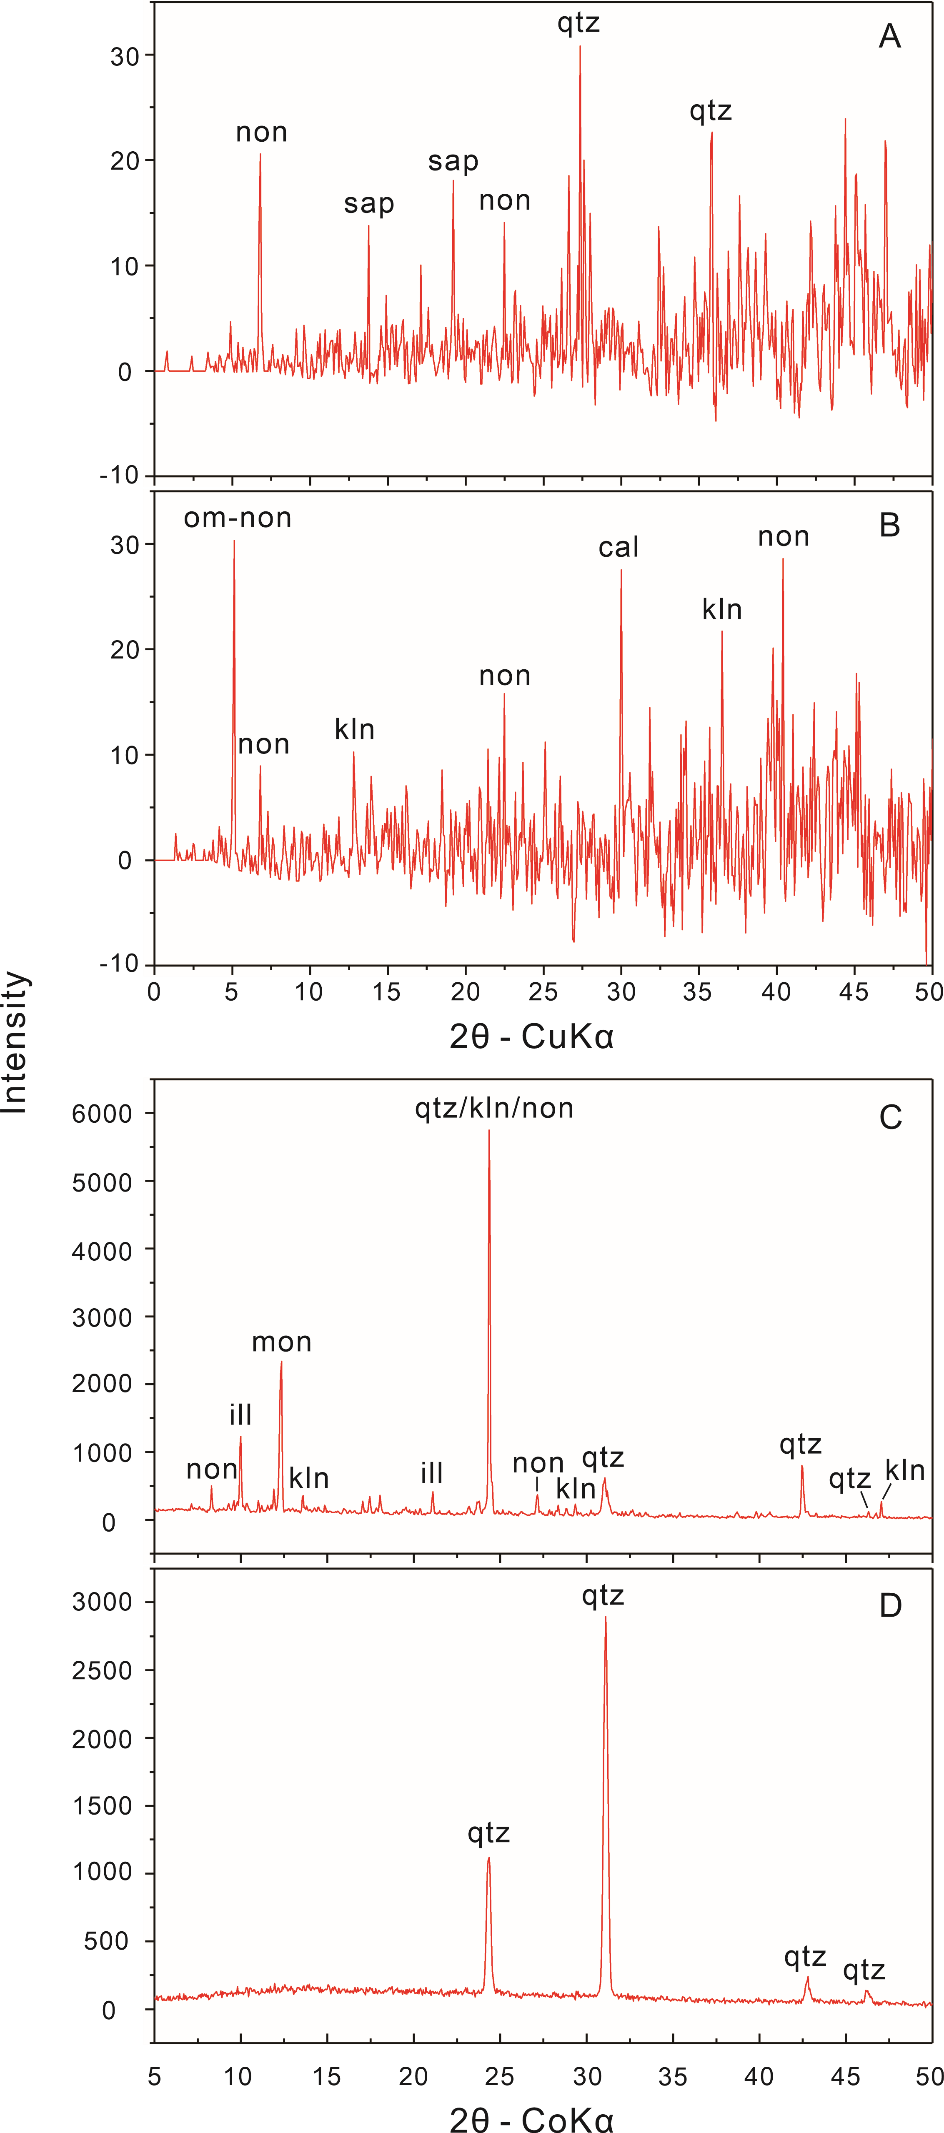


**Fig. S2. XRD patterns of two solid inclusions within gypsum.** **(A)** A µXRD pattern of a solid inclusion the same as that in Fig. S5A. **(B)** A µXRD pattern of a solid inclusion the same as that in Fig. S4A. **(C)** A XRD pattern of materials extracted from halite mixed with quartz standard. **(D)** A XRD pattern of the quartz standard. Abbreviations: non – nontronite; sap – saponite; qtz – quartz; om-non – organic matter-nontronite associations; kln – kaolinite; cal – calcite; ill – illite; mon – montmorillonite.


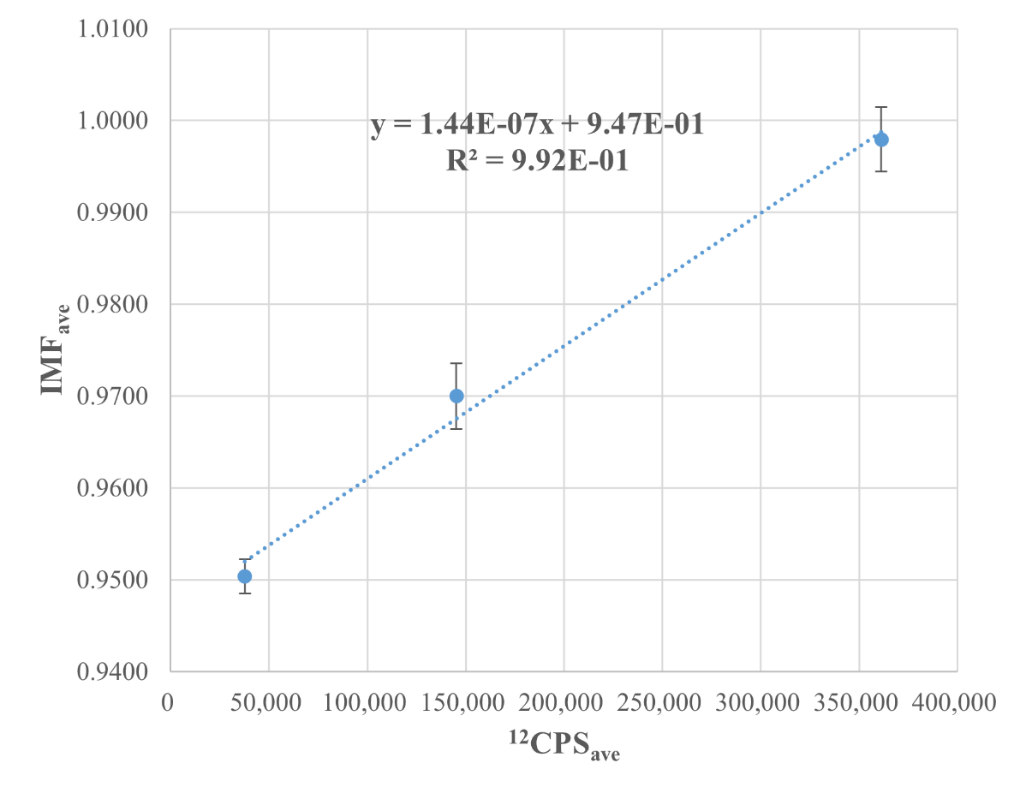


**Fig. S3.** **Correlation between the average IMF and average 12C⁻ secondary ion counts (CPS) for the NanoSIMS carbon isotope standard IAEA-600.** Values for IMF and 12C⁻ CPS are provided in Table S2.


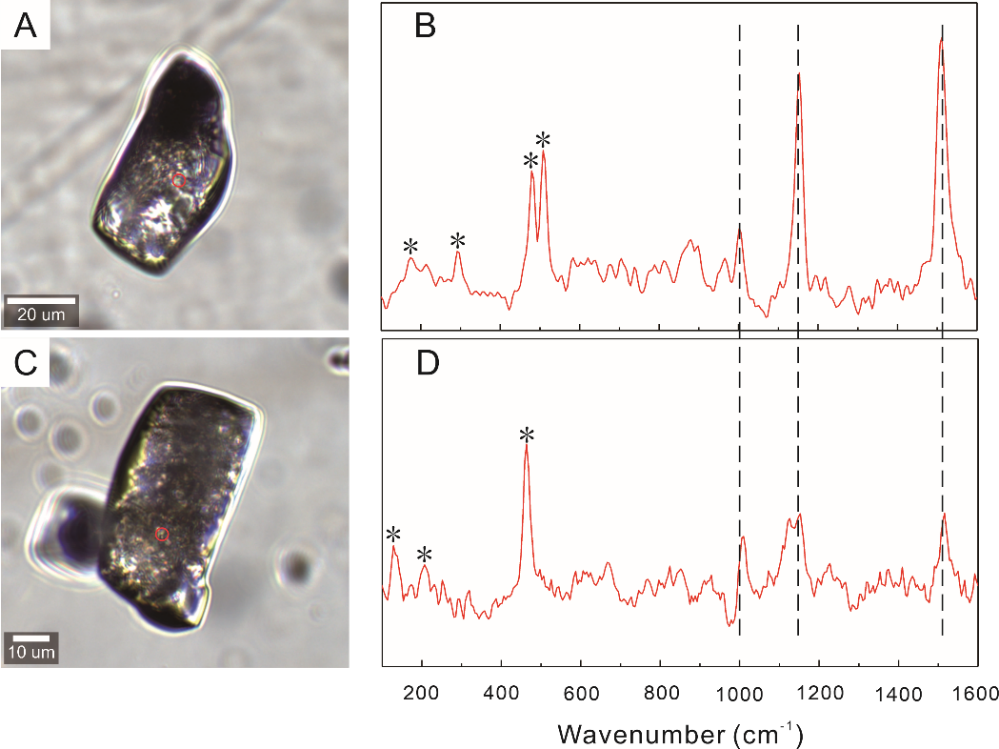


**Fig. S4.** **Photomicrographs of halite fluid inclusions and their corresponding Raman spectra.** Red circles in the fluid inclusions indicate the detection points for laser Raman spectroscopy. Asterisks on the Raman spectra denote mineral Raman peaks, and dashed lines represent the three Raman peaks of β-carotene. **(A-B)** A fluid inclusion and its corresponding Raman spectrum. Asterisks in **(B)** highlight the Raman peaks of sanidine. **(C-D)** A fluid inclusion and its corresponding Raman spectrum. Asterisks in **(D)** highlight the Raman peaks of quartz.


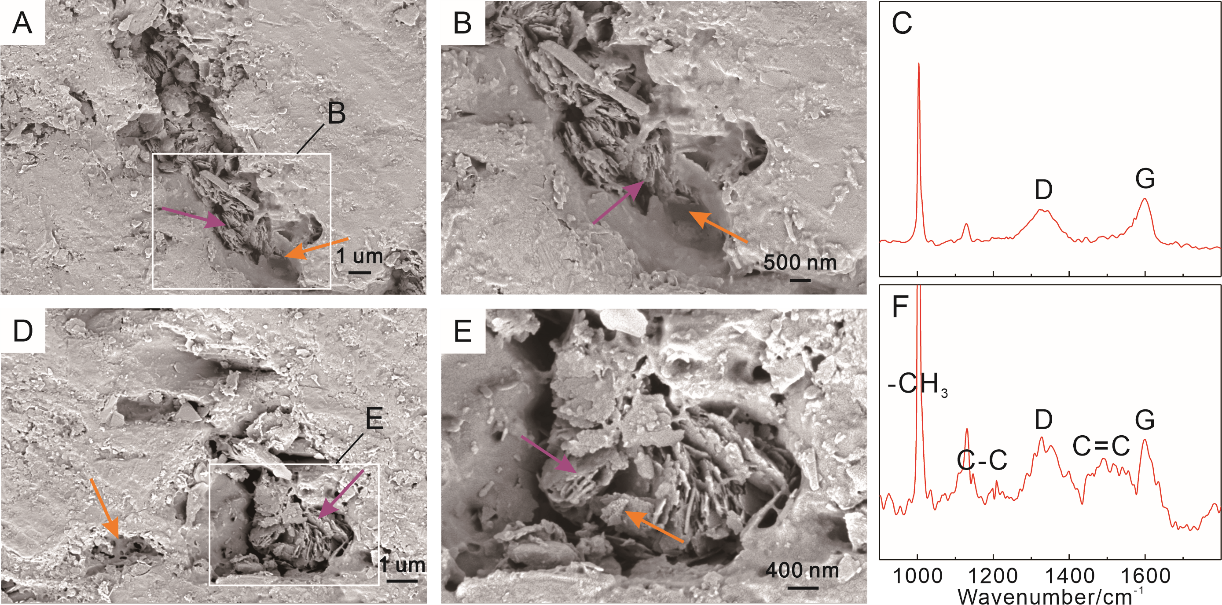


**Fig. S5.** **SEM images and corresponding Raman spectra of gypsum solid inclusions.** Purple arrows indicate clay minerals, and orange arrows indicate organic matter. **(A)** SEM image of a gypsum solid inclusion showing platy clay minerals and associated organic matter. The area outlined in white is enlarged in **(B)**. **(B)** Higher magnification image showing the close spatial association between clay minerals and adsorbed organic matter. **(C)** Raman spectrum acquired from the area in **(B)**, with D and G bands indicating kerogen. **(D)** SEM image of another gypsum solid inclusion, showing platy clay minerals and organic matter. The white box marks the area enlarged in **(E)**. **(E)** Clay minerals with suspected spherical organic aggregates adsorbed on their surfaces. **(F)** Raman spectrum from the area in **(E)**, showing D and G bands of kerogen. Peaks corresponding to C=C, C–C, and –CH₃ indicate the presence of β-carotene; the –CH₃ peak overlaps with a gypsum peak near ~1000 cm⁻¹.


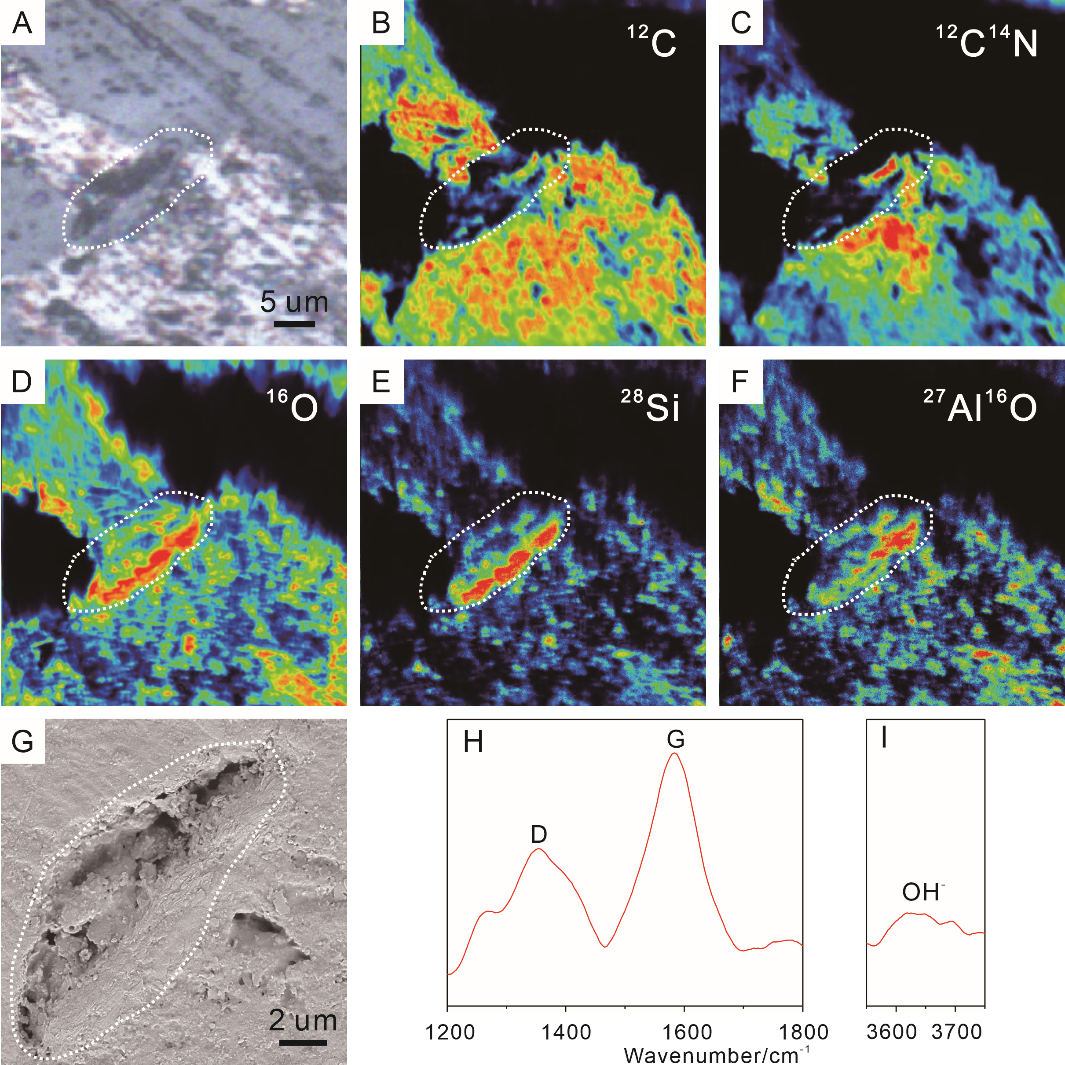


**Fig. S6. Optical and SEM images, Raman spectra, and NanoSIMS elemental maps of a solid inclusion within gypsum.** The region outlined by the white dashed line corresponds to the same area across **(A-G)**. **(A)** An optical image of a gypsum solid inclusion. **(B-F)** NanoSIMS elemental maps of the inclusion in **(A)**, showing distribution of elements 12C (B), 12C14N (C), 16O (D), 28Si (E) and 27Al16O (F), respectively. The more intense the color, the stronger the response, with red being the strongest response in all cases. **(G)** A SEM image of the solid inclusion shown in **(A)**. **(H-I)** Raman spectrum of the inclusion shown in **(G)**, showing the D peak and G peak of kerogen and OH- peaks of clay minerals.


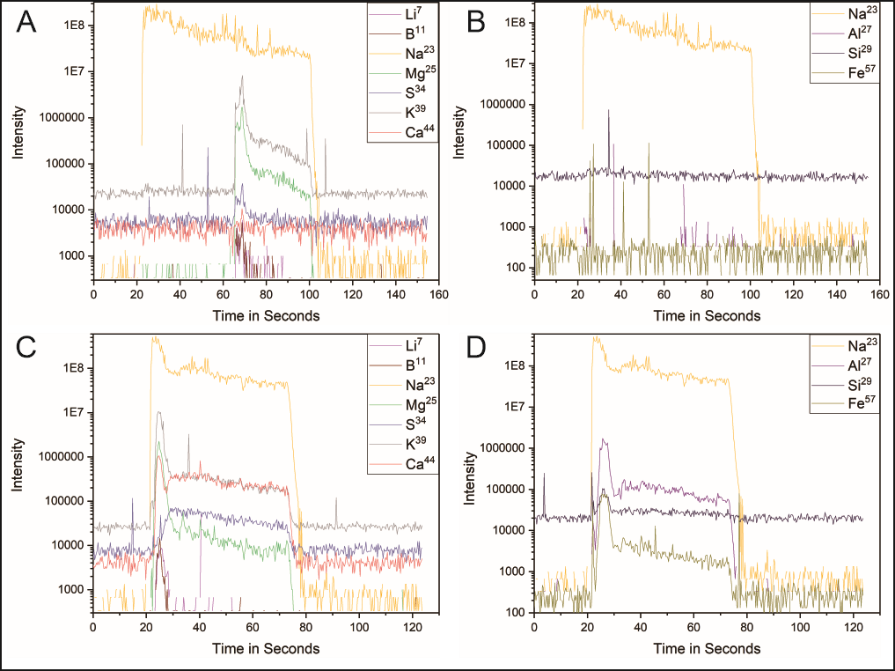


**Fig. S7.** **Original LA-ICP-MS isotopic analysis signals from two representative fluid inclusions. (A-B)** Analysis signals from a fluid inclusion containing no solid phase. **(C-D)** Analysis signals from a fluid inclusion containing β-carotene.

**3. Supplementary Tables**

**Table S1. U-series dating data of gypsum.**

| Sample  number | 238U (ppb) | 232Th (ppb) | 230Th/232Th  (atomic x10-6) | δ234U*  (measured value) | 230Th/238U  (activity ratio) | 230Th age (yr)  (uncorrected value) | 230Th age (yr)  (corrected value) | δ234Uinitial**  (corrected value) | 230Th age (yr BP)***  (corrected value) |
| --- | --- | --- | --- | --- | --- | --- | --- | --- | --- |
| S113 | 41.5 ± 0.1 | 33.2 ± 0.7 | 25.9 ± 0.5 | 198.3 ± 3.3 | 1.2559 ± 0.0065 | 458125 ± 33957 | 443540 ± 31898 | 693 ± 64 | 443517 ± 31898 |
| H14 | 188 ± 1 | 101.2 ± 2.6 | 39.2 ± 1.0 | 215.3 ± 3.1 | 1.2801 ± 0.0065 | 462116 ± 33074 | 452939 ± 30835 | 773 ± 69 | 452914 ± 30835 |
| H13 | 191 ± 0 | 100.4 ± 2.5 | 40.4 ± 1.0 | 218.5 ± 3.4 | 1.2866 ± 0.0060 | 472135 ± 35014 | 463392 ± 32729 | 808 ± 76 | 463367 ± 32729 |

*δ234U = ([234U/238U]activity – 1) x 1000. ** δ234Uinitial was calculated based on 230Th age (T), i.e., δ234Uinitial = δ234Umeasured x eλ234xT.

Corrected 230Th ages assume the initial 230Th/232Th atomic ratio of 4.4 ± 1.1 x10-6. Those are the values for a material at secular equilibrium, with the bulk earth 232Th/238U value of 3.8. The errors are arbitrarily assumed to be 50%.

***B.P. stands for "Before Present" where the "Present" is defined as the year 2000 A.D.

The error is 2s error.

**Table S2. NanoSIMS Carbon isotopic composition of standard samples and organic matter in gypsum solid inclusions.**

| Sample type | File | Mean 12C | Stddev 12C | Area | Mean 13C | Stddev 13C | Mean ratio 13C/12C | Stddev ratio 13C/12C | 12Cps | 13C/12C | RSE (‰) | δ13Craw | IMF | IMFqsa. | δ13C-IMFqsa. (‰) | 1σ |
| --- | --- | --- | --- | --- | --- | --- | --- | --- | --- | --- | --- | --- | --- | --- | --- | --- |
| Standard samples (IAEA-600, caffeine) | 20250417-iaea-600-as2-1-1 | 2852 | 592 | 9856 | 31 | 9 | 110 | 21 | 3.57E+05 | 0.01095 | 1.9 | -25.12 | 1.0028 | 0.9986 | -23.8 | 10.2 |
| 20250417-iaea-600-as2-1-2 | 2794 | 569 | 10829 | 30 | 8 | 109 | 21 | 3.49E+05 | 0.01090 | 1.8 | -29.79 | 0.9979 | 0.9976 | -27.4 | 10.2 |
| 20250417-iaea-600-as2-1-3 | 3083 | 881 | 6156 | 34 | 11 | 109 | 20 | 3.85E+05 | 0.01086 | 2.4 | -33.13 | 0.9945 | 1.0027 | -35.8 | 10.3 |
| 20250417-iaea-600-as2-1-4 | 2830 | 725 | 3328 | 31 | 10 | 109 | 21 | 3.54E+05 | 0.01089 | 3.3 | -31.14 | 0.9966 | 0.9982 | -29.4 | 10.5 |
| 20250417-iaea-600-as3-1-1 | 1203 | 258 | 9856 | 13 | 4 | 107 | 31 | 1.50E+05 | 0.01064 | 3.0 | -52.96 | 0.9741 | 0.9694 | -23.0 | 10.4 |
| 20250417-iaea-600-as3-1-2 | 1171 | 239 | 10829 | 12 | 4 | 106 | 32 | 1.46E+05 | 0.01058 | 2.9 | -58.78 | 0.9681 | 0.9688 | -28.5 | 10.4 |
| 20250417-iaea-600-as3-1-3 | 1111 | 482 | 6156 | 12 | 6 | 106 | 37 | 1.39E+05 | 0.01057 | 4.4 | -59.15 | 0.9678 | 0.9677 | -27.8 | 10.9 |
| 20250417-iaea-600-as4-1-1 | 358 | 95 | 9856 | 4 | 2 | 105 | 60 | 4.48E+04 | 0.01041 | 5.8 | -73.57 | 0.9529 | 0.9544 | -29.3 | 11.5 |
| 20250417-iaea-600-as4-1-2 | 331 | 88 | 10829 | 3 | 2 | 104 | 65 | 4.14E+04 | 0.01036 | 6.0 | -77.98 | 0.9484 | 0.9539 | -33.4 | 11.6 |
| 20250417-iaea-600-as4-1-3 | 229 | 137 | 6156 | 2 | 2 | 105 | 104 | 2.86E+04 | 0.01038 | 12.6 | -76.41 | 0.9500 | 0.9521 | -29.9 | 16.1 |
| 20250417-iaea-600-as4-1-4 | 289 | 121 | 3328 | 3 | 2 | 105 | 84 | 3.61E+04 | 0.01038 | 13.8 | -76.17 | 0.9502 | 0.9531 | -30.7 | 17.1 |
|  | | | | | | | | | | | | | | | | |
| Organic matter in gypsum inclusions | 20250417-SG-7-03_1-1 | 488 | 133 | 4021 | 5 | 3 | 103 | 48 | 2.44E+04 | 0.01027 | 7.3 | -85.97 | 0.9402 | 0.9515 | -39.3 | 12.4 |
| 20250417-SG-7-03_1-2 | 130 | 35 | 1908 | 1 | 1 | 102 | 91 | 6.51E+03 | 0.01009 | 20.6 | -101.77 | 0.9239 | 0.9489 | -53.4 | 22.9 |
| 20250417-SG-7-03_1-3 | 144 | 32 | 4225 | 1 | 1 | 103 | 87 | 7.20E+03 | 0.01020 | 13.1 | -92.55 | 0.9334 | 0.9490 | -43.8 | 16.5 |
| 20250417-SG-7-07_3-1 | 1118 | 352 | 1607 | 11 | 5 | 103 | 33 | 2.24E+05 | 0.01027 | 7.9 | -86.23 | 0.9399 | 0.9797 | -67.3 | 12.7 |
| 20250417-SG-7-07_3-2 | 1613 | 240 | 6221 | 17 | 5 | 104 | 26 | 3.23E+05 | 0.01043 | 3.1 | -71.56 | 0.9550 | 0.9938 | -65.8 | 10.5 |
| 20250417-SG-7-07_3-3 | 1502 | 96 | 2499 | 15 | 4 | 102 | 27 | 3.00E+05 | 0.01024 | 5.3 | -88.82 | 0.9372 | 0.9906 | -80.2 | 11.3 |
| 20250417-SG-7-08_1-1 | 778 | 100 | 6080 | 8 | 3 | 103 | 36 | 1.56E+05 | 0.01029 | 4.5 | -84.01 | 0.9422 | 0.9701 | -55.8 | 11.0 |
| 20250417-SG-7-08_1-2 | 588 | 76 | 1759 | 6 | 3 | 103 | 42 | 1.18E+05 | 0.01034 | 9.7 | -79.71 | 0.9466 | 0.9647 | -46.0 | 13.9 |
| 20250417-SG-7-08_1-3 | 482 | 88 | 7025 | 5 | 2 | 104 | 48 | 9.63E+04 | 0.01034 | 5.5 | -79.58 | 0.9467 | 0.9617 | -42.9 | 11.4 |

**Table S3. LA-ICP-MS data of fluid inclusions in halite crystals.**

| Groups | Fluid inclusion NO. | Al | Si | Fe | S | Ca | Mg | B | Al/B | Si/B | Fe/B | S/B | Ca/B | Mg/B |
| --- | --- | --- | --- | --- | --- | --- | --- | --- | --- | --- | --- | --- | --- | --- |
| Group A: Fluid inclusions containing β-carotene | a06-0530 | 43148 | 92424 | 53415 | 179542 | 544181 | 246109 | 839 | 51.43 | 110.17 | 63.67 | 214.01 | 648.64 | 293.35 |
| a12-0530 | 1395 | 743395 | <15583 | 226073 | 5818745 | 1580403 | 8007 | 0.17 | 92.84 | 0.00 | 28.23 | 726.66 | 197.37 |
| a15-0530 | 2569 | 41567 | 3243 | 94554 | 33258 | 393668 | 959 | 2.68 | 43.37 | 3.38 | 98.65 | 34.70 | 410.70 |
| a25-0530 | 84712 | 224484 | 44620 | <32754 | 211813 | 306000 | 1120 | 75.61 | 200.37 | 39.83 | 0.00 | 189.06 | 273.12 |
| a30-0530 | 27257 | 125916 | 69159 | 223947 | 197067 | 369107 | 866 | 31.48 | 145.42 | 79.87 | 258.63 | 227.59 | 426.27 |
| a31-0530 | 224301 | 905977 | 90608 | <98447 | 809212 | 250681 | 928 | 241.69 | 976.23 | 97.63 | 0.00 | 871.96 | 270.12 |
| a32-0530 | 96191 | 690444 | 51878 | 334788 | 288862 | 214427 | 2247 | 42.81 | 307.25 | 23.09 | 148.98 | 128.55 | 95.42 |
| a33-0530 | 64009 | 534274 | 32784 | 331388 | 867136 | 336542 | 1330 | 48.13 | 401.73 | 24.65 | 249.18 | 652.01 | 253.05 |
| a03-0531 | 7889 | 12649 | 3189 | 307656 | 1855 | 618515 | 784 | 10.06 | 16.13 | 4.07 | 392.32 | 2.37 | 788.72 |
| a04-0531 | 3580 | 35968 | 2760 | 83764 | 17190 | 435426 | 915 | 3.91 | 39.29 | 3.01 | 91.50 | 18.78 | 475.62 |
| a07-0531 | 5670 | 30267 | 4059 | 95972 | 51347 | 401884 | 1111 | 5.10 | 27.24 | 3.65 | 86.37 | 46.21 | 361.69 |
| a09-0531 | 1611 | 10933 | 1148 | 134993 | 11714 | 494238 | 1037 | 1.55 | 10.54 | 1.11 | 130.15 | 11.29 | 476.49 |
| a10-0531 | 4788 | <17100 | 3119 | <17881 | 56431 | 419406 | 1154 | 4.15 | 0.00 | 2.70 | 0.00 | 48.91 | 363.54 |
| a11-0531 | 599 | 84974 | <5583 | <78302 | 52736 | 302260 | 1141 | 0.53 | 74.48 | 0.00 | 0.00 | 46.22 | 264.94 |
| a16-0531 | 4934 | 20367 | 3744 | 117344 | 2441 | 479919 | 778 | 6.34 | 26.17 | 4.81 | 150.77 | 3.14 | 616.61 |
| a17-0531 | 75966 | 280926 | 39797 | 307357 | 1956306 | 579857 | 2194 | 34.62 | 128.02 | 18.14 | 140.07 | 891.52 | 264.25 |
| a19-0531 | 29840 | 131525 | 17233 | 1688936 | 8771431 | 3159249 | 5339 | 5.59 | 24.63 | 3.23 | 316.33 | 1642.86 | 591.72 |
| a20-0531 | 27935 | 417085 | 15250 | 2489488 | 7157439 | 1490837 | 2849 | 9.81 | 146.42 | 5.35 | 873.95 | 2512.66 | 523.37 |
| a23-0531 | 2625 | 73460 | <1632 | 18673 | 59779 | 275166 | 973 | 2.70 | 75.48 | 0.00 | 19.19 | 61.42 | 282.74 |
| a25-0531 | 43515 | 411087 | 152983 | 782073 | 4521497 | 739348 | 3145 | 13.84 | 130.72 | 48.65 | 248.69 | 1437.80 | 235.11 |
| a26-0531 | 6383 | 373062 | <13332 | 1934581 | 10035235 | 1795228 | 4170 | 1.53 | 89.47 | 0.00 | 463.98 | 2406.79 | 430.56 |
|  | | | | | | | | | | | | | | |
| Group B: Fluid inclusions containing no solid phase | a03-0530 | 3 | 3858 | 100 | 247501 | 1523 | 646849 | 950 | 0.00 | 4.06 | 0.11 | 260.57 | 1.60 | 681.01 |
| a04-0530 | 4 | 9881 | 953 | 222917 | 2126 | 626666 | 1081 | 0.00 | 9.14 | 0.88 | 206.29 | 1.97 | 579.93 |
| a05-0530 | 4 | 2753 | 118 | 71754 | 962 | 419427 | 1243 | 0.00 | 2.21 | 0.09 | 57.71 | 0.77 | 337.31 |
| a10-0530 | <210 | <86439 | <6050 | 260631 | 102155 | 1230433 | 1919 | 0.00 | 0.00 | 0.00 | 135.84 | 53.24 | 641.29 |
| a11-0530 | <108 | <50062 | <3191 | 58511 | 54100 | 452704 | 991 | 0.00 | 0.00 | 0.00 | 59.01 | 54.56 | 456.59 |
| a13-0530 | 27 | 2656 | <184 | 169668 | 4066 | 214058 | 559 | 0.05 | 4.75 | 0.00 | 303.34 | 7.27 | 382.71 |
| a14-0530 | <13 | <10992 | <841 | 74852 | 32260 | 329247 | 668 | 0.00 | 0.00 | 0.00 | 112.04 | 48.29 | 492.84 |
| a16-0530 | 536 | <11583 | <688 | 39923 | <2394 | 275222 | 1150 | 0.47 | 0.00 | 0.00 | 34.71 | 0.00 | 239.31 |
| a17-0530 | 78 | 32729 | <1034 | 75716 | <3013 | 537843 | 938 | 0.08 | 34.89 | 0.00 | 80.72 | 0.00 | 573.36 |
| a26-0530 | 95 | 66041 | <860 | 172368 | 12962 | 408236 | 707 | 0.13 | 93.44 | 0.00 | 243.88 | 18.34 | 577.60 |
| a27-0530 | 167 | 141619 | <5983 | 119675 | 59732 | 441198 | 1602 | 0.10 | 88.38 | 0.00 | 74.69 | 37.28 | 275.34 |
| a34-0530 | <77 | 114577 | <7451 | 155218 | 37737 | 274211 | 786 | 0.00 | 145.84 | 0.00 | 197.57 | 48.03 | 349.02 |
| a05 | 12 | <1149 | <96 | 69626 | 1286 | 506636 | 1273 | 0.01 | 0.00 | 0.00 | 54.67 | 1.01 | 397.84 |
| a06 | <76 | 190899 | <3836 | 212092 | 51079 | 380056 | 536 | 0.00 | 356.25 | 0.00 | 395.80 | 95.32 | 709.25 |
| a12 | 39 | <6401 | <481 | 70704 | 1745 | 377248 | 777 | 0.05 | 0.00 | 0.00 | 91.02 | 2.25 | 485.64 |
| a13 | <60 | 72200 | <2875 | 145385 | 42972 | 325113 | 429 | 0.00 | 168.46 | 0.00 | 339.22 | 100.26 | 758.57 |
| a21 | <2 | <919 | <66 | 292102 | 1316 | 523178 | 643 | 0.00 | 0.00 | 0.00 | 453.94 | 2.05 | 813.05 |
| a22 | 196 | <23365 | <1638 | 274000 | <4589 | 380175 | 446 | 0.44 | 0.00 | 0.00 | 614.93 | 0.00 | 853.21 |
| a27 | 364 | 5416 | 993 | 95198 | 25759 | 529589 | 1306 | 0.28 | 4.15 | 0.76 | 72.91 | 19.73 | 405.59 |
